# Supplementary material for: Iron Modified Titanate Nanotube Arrays for Photoelectrochemical Removal of E. coli
Source: MDPI journal article supplement (doi:10.3390/nano11081944), 2021-07-28
Supplement: s1 [file s1]

# Iron Modified Titanate Nanotube Arrays for Photoelectrochemical Removal of *E. Coli*

Chia-Hung Chen <sup>1</sup>, Yen-Ping Peng <sup>1,\*</sup>, Ming-Hsun Lin <sup>2</sup>, Ken-Lin Chang <sup>1</sup>, Yung-Chang Lin <sup>3,4,\*</sup> and Jian Sun <sup>5</sup>

Supplementary Materials

Including three figures

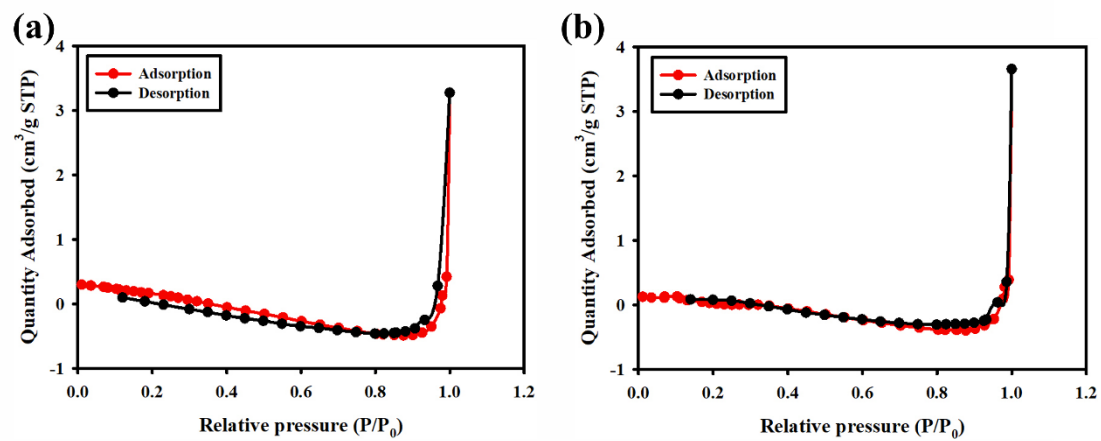

**Figure S1. BET analysis of (a) TNAs and (b) Fe/TNAs.**

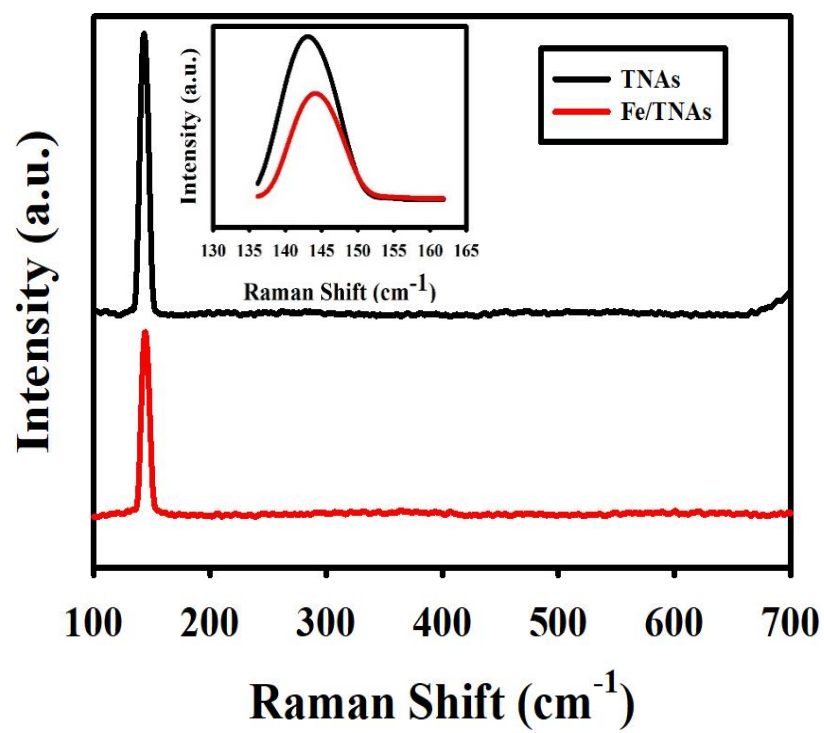

Figure S2. Raman spectrum of TNAs and Fe/TNAs

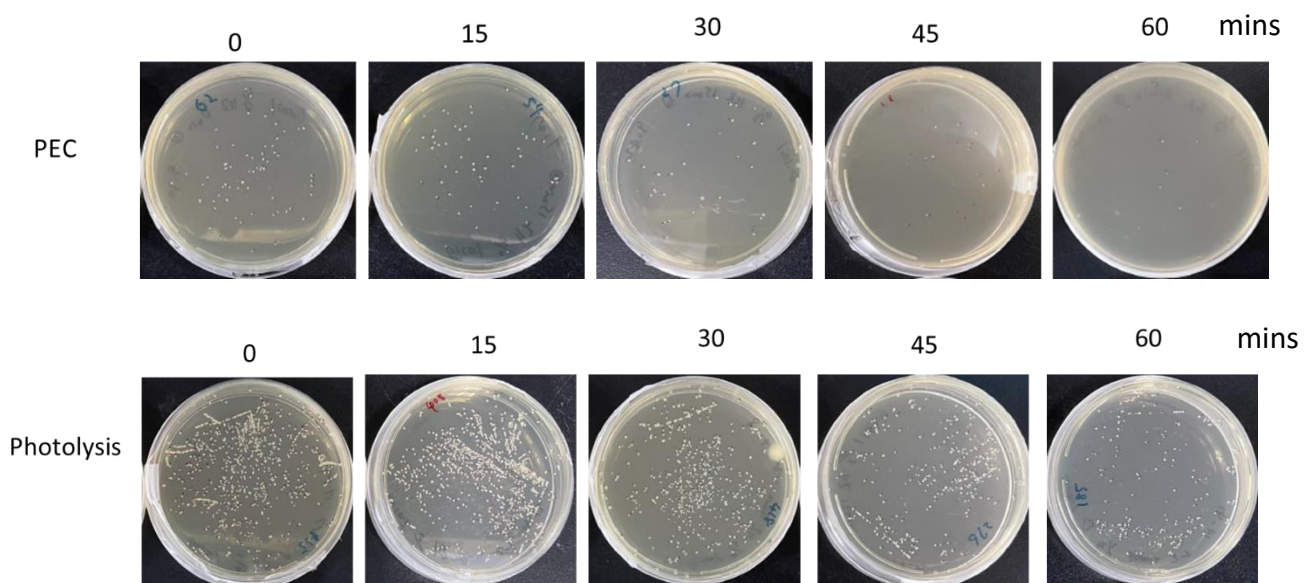

**Figure S3. Images of E Coli removal in photolysis and PEC system**
